# Supplementary material for: The grasshopper genome reveals long-term gene content conservation of the X Chromosome and temporal variation in X Chromosome evolution
Source: HighWire-hosted journal article supplement (doi:10.1101/gr.278794.123), 2024-07-01
Supplement: Supplemental_Figures.docx [file Supplemental_Figures.docx]

**Description of supplementary figures**

**Supplemental Fig S1. Satellite distribution along chromosomes in the migratory locust genome.**

**Supplemental Fig S2. Genomic features along migratory locust chromosomes.** **a**, gene density, GC content, nucleotide diversity, recombination rate; **b**, TE profile including LINE, DNA, LTR, Helitron transposons and simple repeat.

**Supplemental Fig S3. Density plot for gene density between X Chromosome and autosomes.**

**Supplemental Fig S4. Boxplot for recombination rate form each chromosome.**

**Supplemental Fig S5. TE percentage and K2P profile.** According to the size, chromosomes were classified into four categories: Large, Medium, Small and X.

**Supplemental Fig S6. Functional enrichment of conservative X-linked genes.** Left is GO terms, right is KEGG terms.

**Supplemental Fig S7. *d*N/*d*S analysis in true bugs.** P values were calculated between X-Sfur and others by 1000 replicates bootstrapping.

**Supplemental Fig S8. Regression analysis between Rho and dn/ds.** a: All genes. b: X chromosome genes alone.

**Supplemental Fig S9. The distribution of X-X and X-Lmig genes along the X chromosome.**

**Supplemental Fig S10. The dosage compensation along each chromosome.**


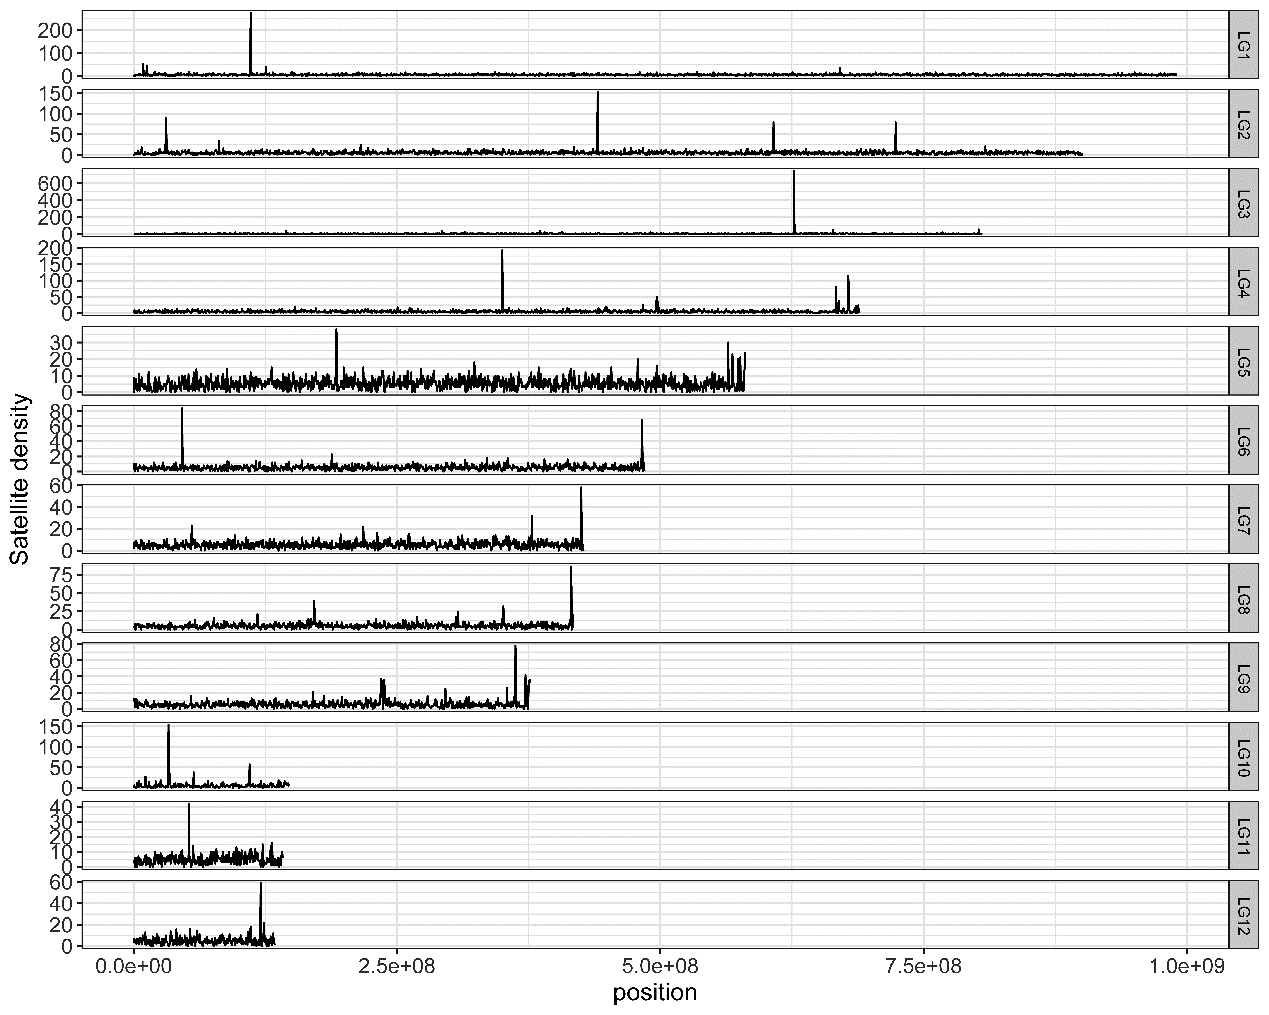


**Supplemental Fig S1. Satellite distribution along chromosomes in the migratory locust genome.**

**a**
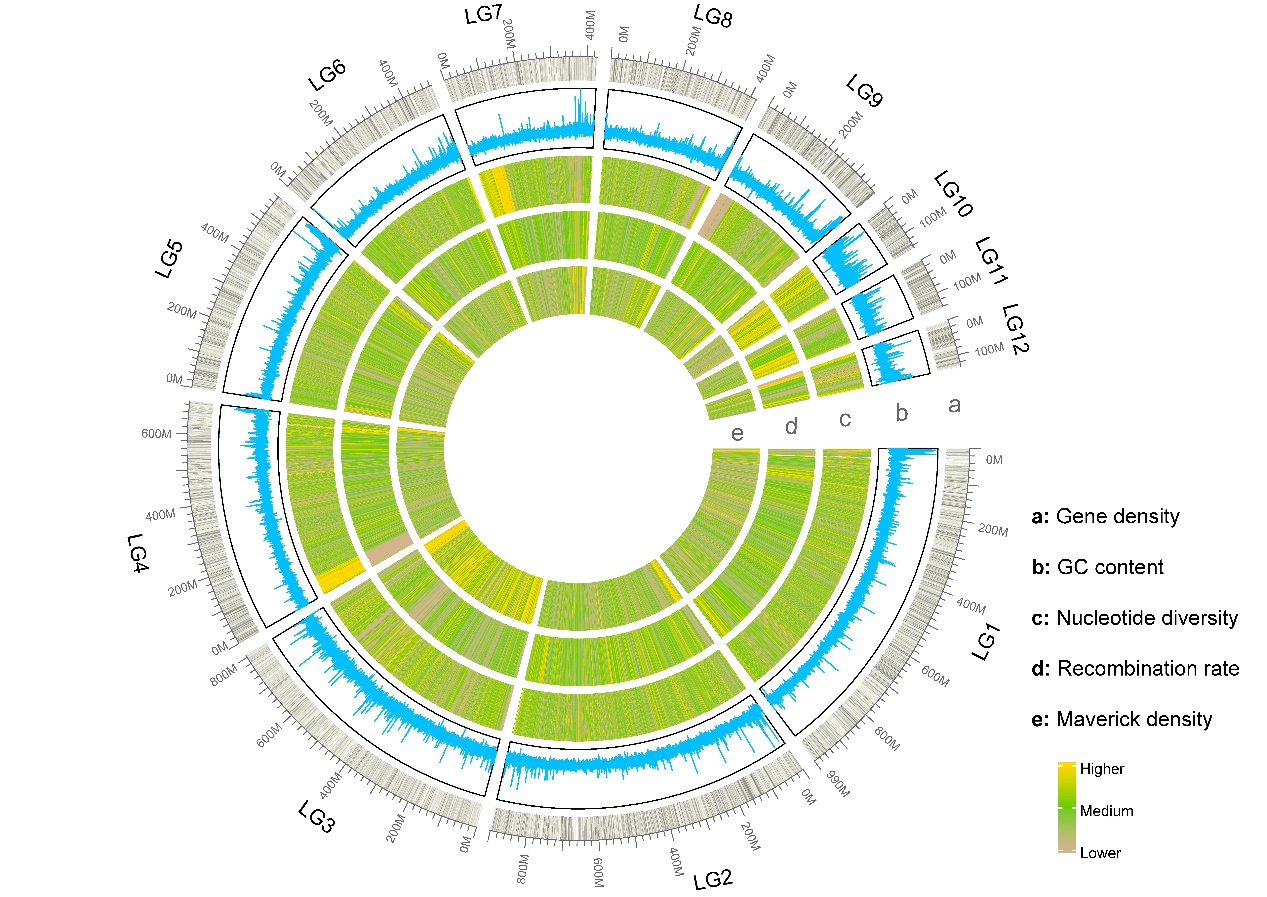


**b**


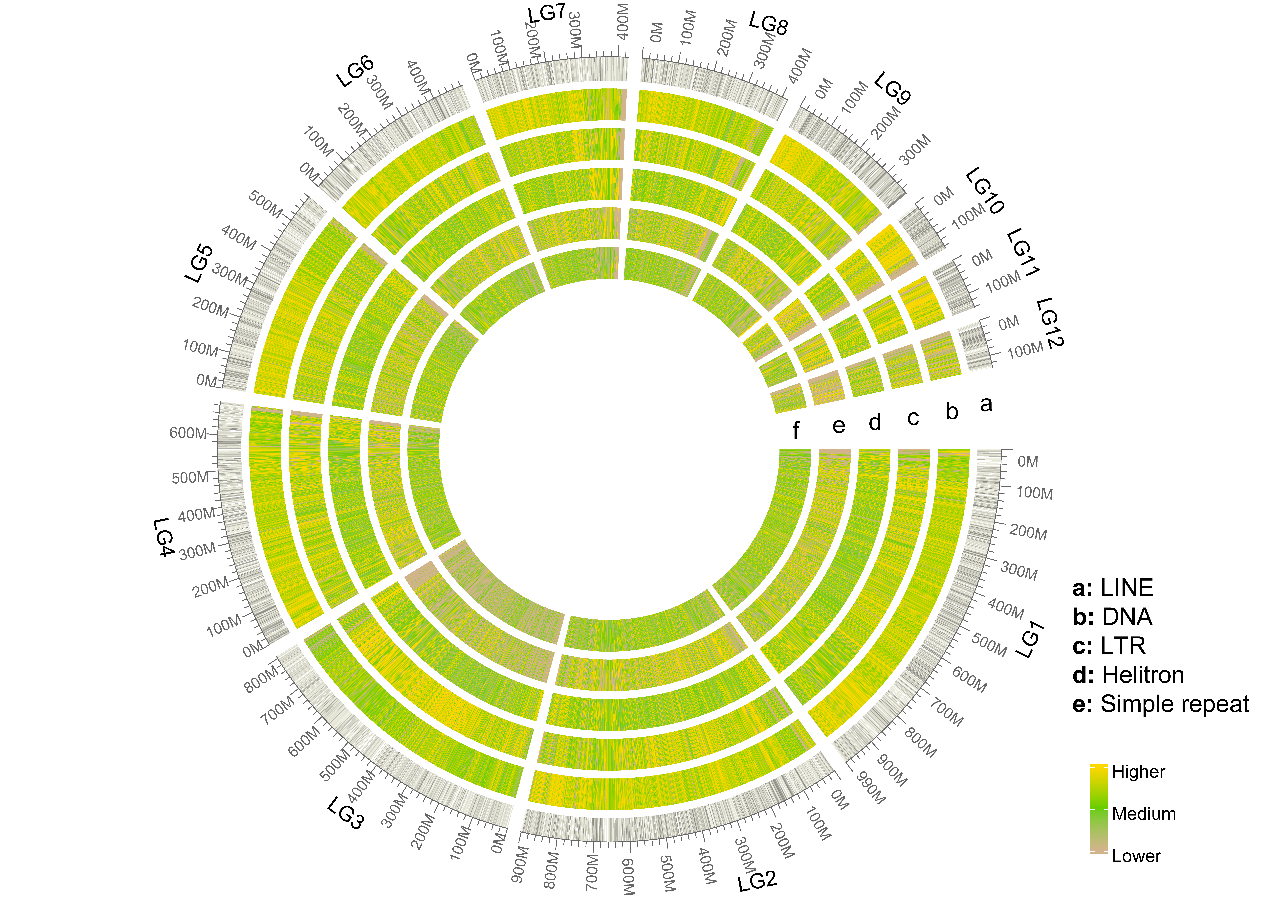


**Supplemental Fig S2. Genomic features along migratory locust chromosomes.** **a**, gene density, GC content, nucleotide diversity, recombination rate; **b**, TE profile including LINE, DNA, LTR, Helitron transposons and simple repeat.


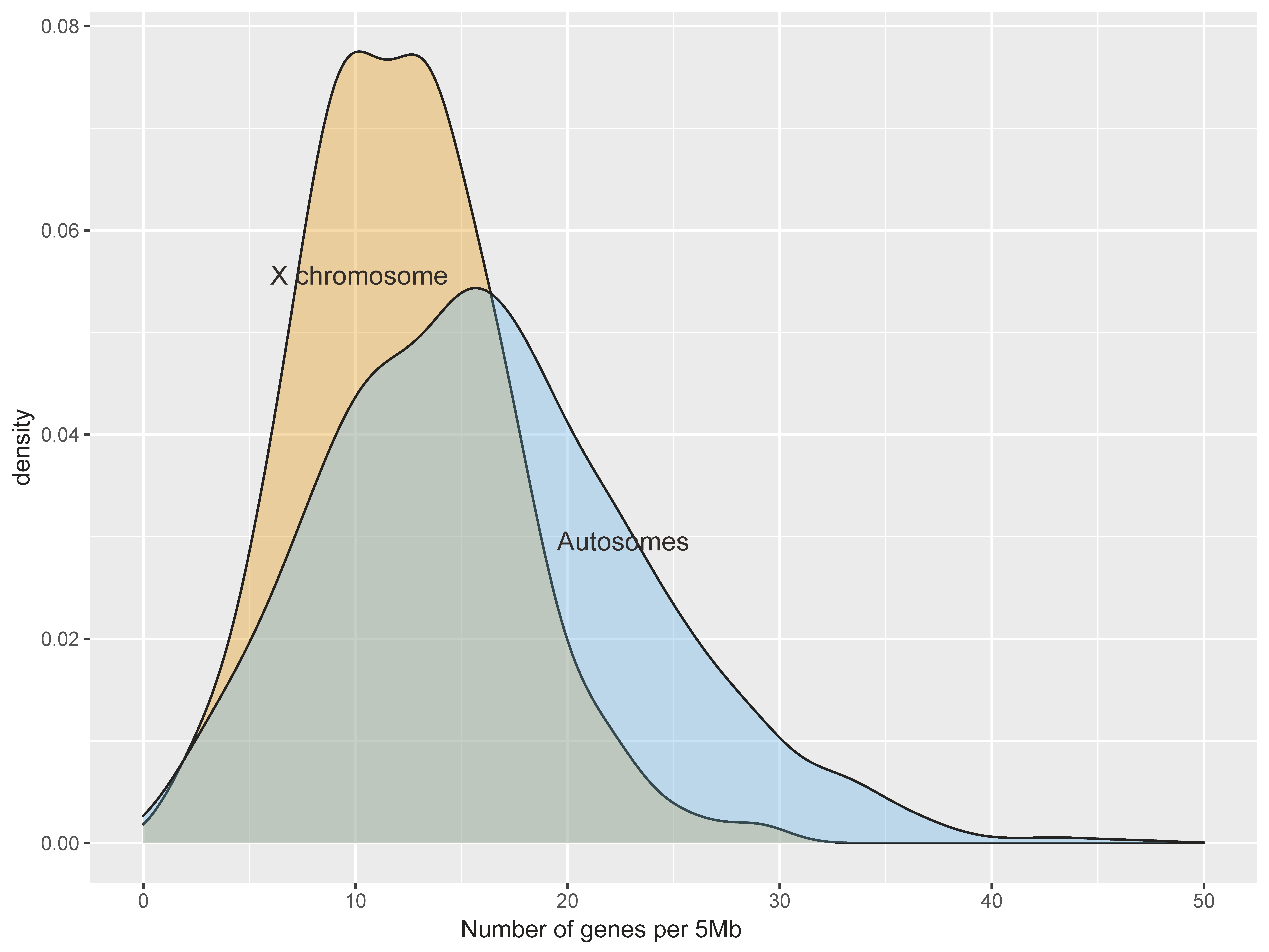


**Supplemental Fig S3. Density plot for gene density between X Chromosome and autosomes.**


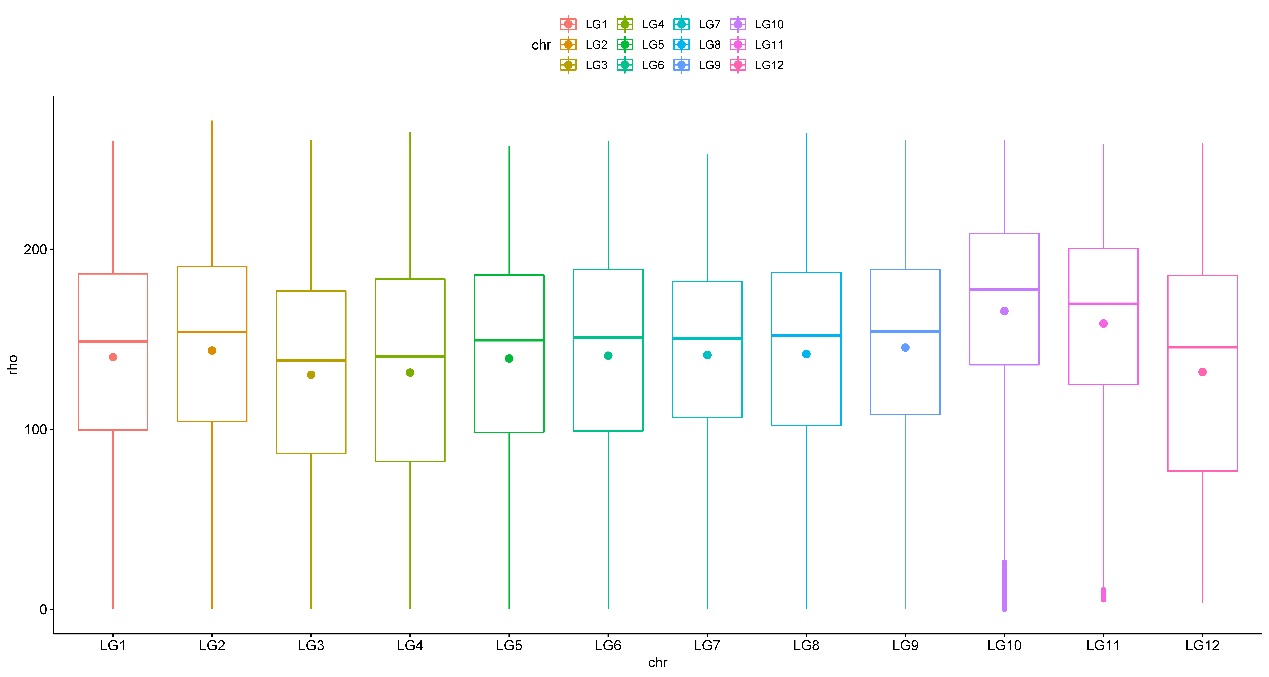


**Supplemental Fig S4. Boxplot for recombination rate for each chromosome. Recombination rate for the X (LG3) is lower than all autosomes (P<0.001) except for LG4 and LG12 (P>0.05)**.


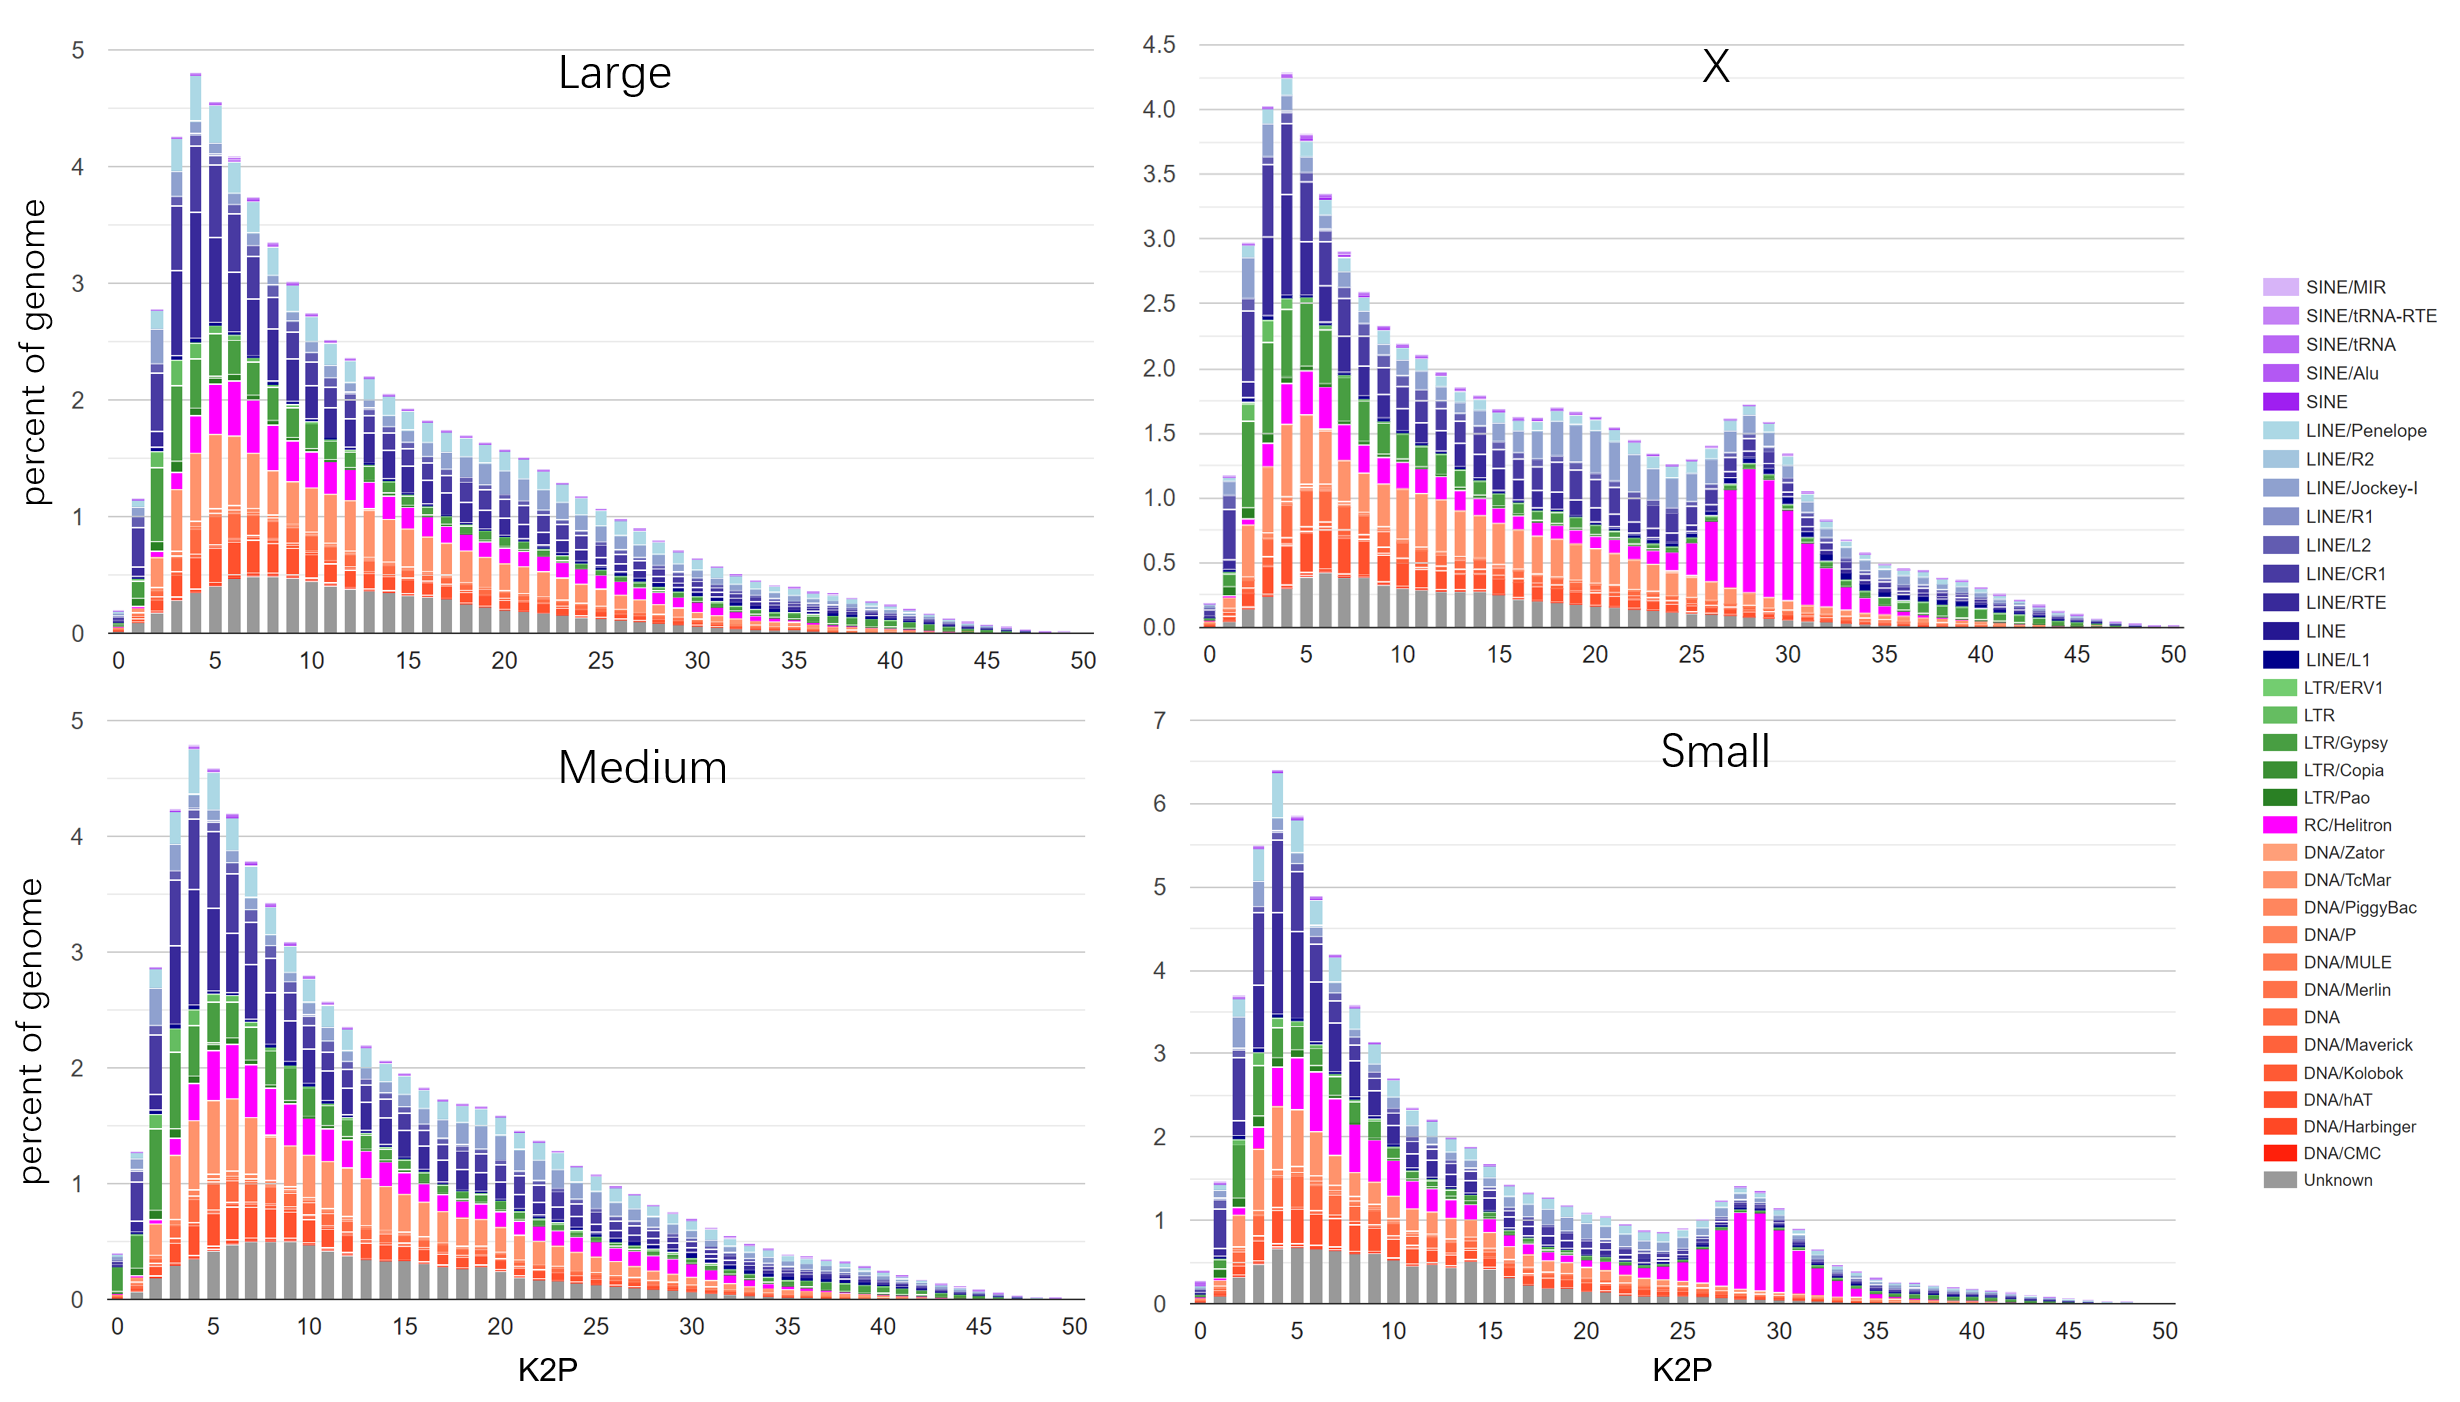


**Supplemental Fig S5. TE percentage and K2P profile.** According to the size, chromosomes were classified into four categories: Large, Medium, Small and X.


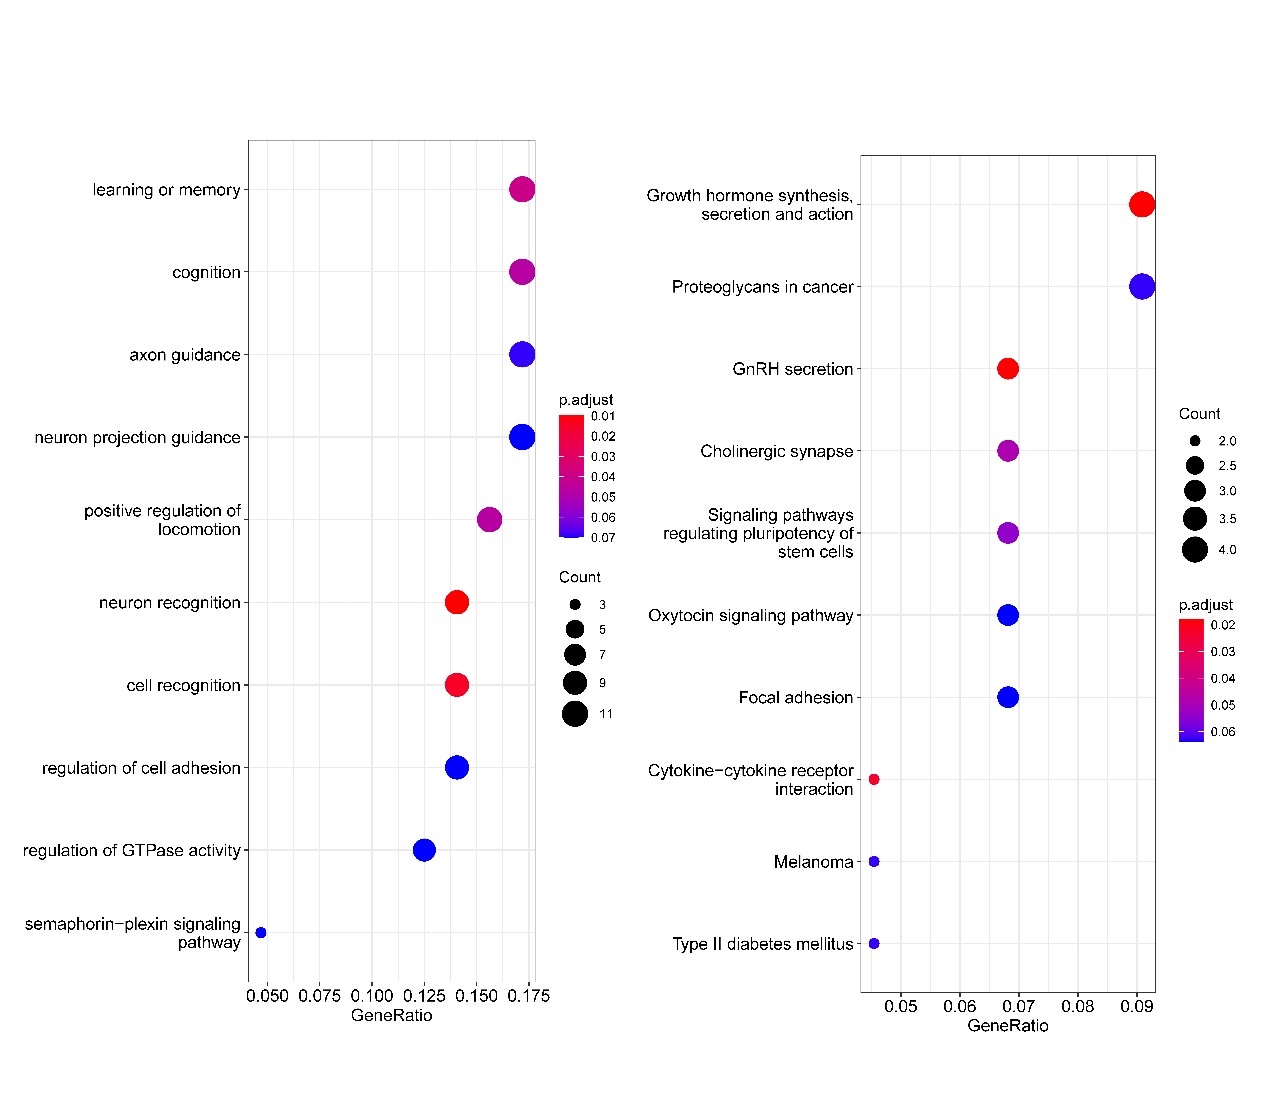


**Supplemental Fig S6. Functional enrichment of conservative X-linked genes.** GO terms on the left, KEGG terms on the right.


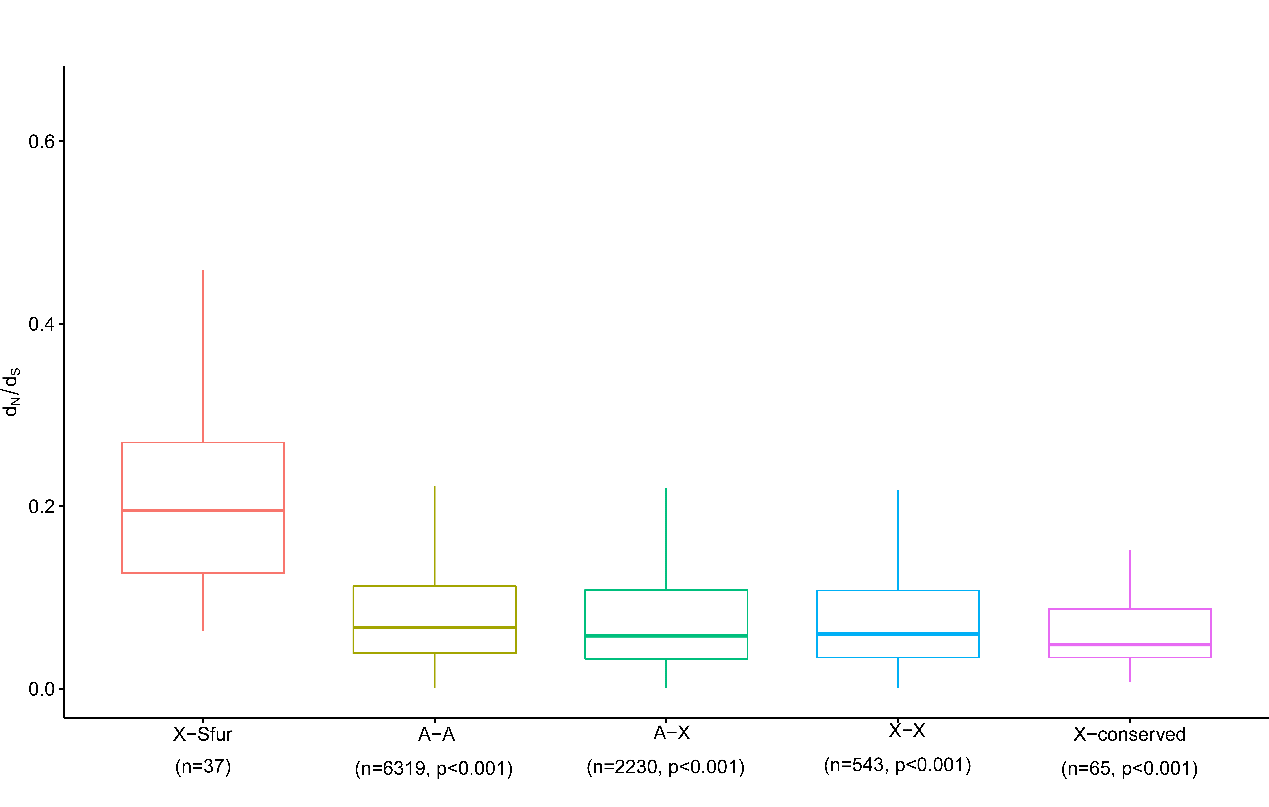


**Supplemental Fig S7. *d*N/*d*S analysis in true bugs.** *d*N/*d*S values were calculated between *Sogatella furcifera* (Sfur) and *Nilaparvata lugens*. P values were calculated between X-Sfur and other categories with 1000 bootstrap replicates.

**Supplemental Fig S8. Regression analysis between Rho and *d*N/*d*S.** a: All genes. b: X chromosome genes alone. Regression equations were calculated by R package ggpubr in a linear model.


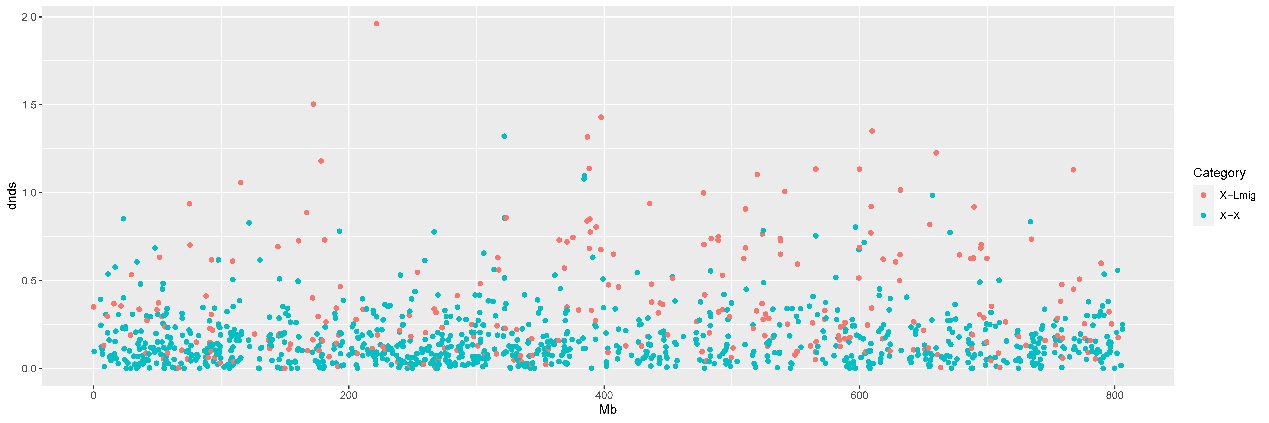


**Supplemental Fig S9. The distribution of X-X and X-Lmig genes along the X chromosome.**


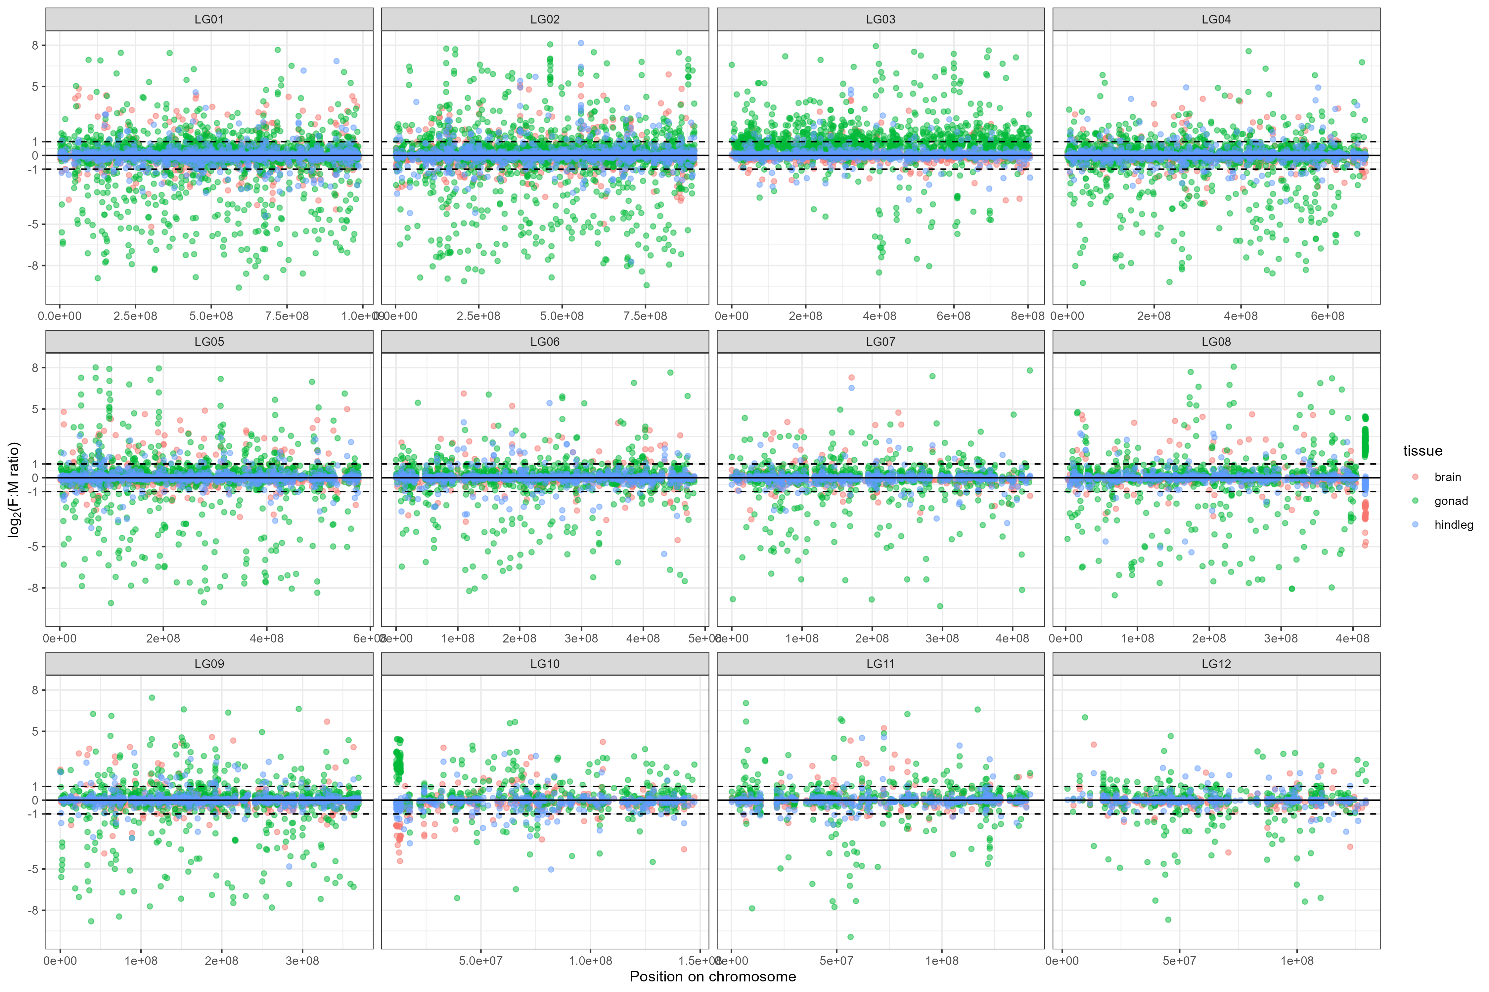
**Supplemental Fig S10. The dosage compensation along each chromosome.**
