# Supplementary material for: The grasshopper genome reveals long-term gene content conservation of the X Chromosome and temporal variation in X Chromosome evolution
Source: HighWire-hosted journal article supplement (doi:10.1101/gr.278794.123), 2024-07-01
Supplement: Supplemental_Tables.docx [file Supplemental_Tables.docx]

**Description of supplementary tables**

**Table S1. Gene number, gene density and intron length of each chromosome.**

**Table S2. dN, dS and dN/dS values of different categories.**

**Table S3. X-linked gene numbers mapping to L. migratoria X chromosome.**

**Table S4. The chi-squared tests P values for X conservation analysis.**

**Table S5. Over/under-enrichment analysis for each grasshopper chromosome.**

**Table S1. Gene number, gene density and intron length of each chromosome.**

| chr | length | gene number | gene density | mean intron length |
| --- | --- | --- | --- | --- |
| LG1 | 991018619 | 3157 | 3.19E-06 | 15383 |
| LG2 | 901651818 | 3040 | 3.37E-06 | 15174 |
| LG3/X | 806237231 | 1985 | 2.46E-06 | 18258 |
| LG4 | 689659731 | 2247 | 3.26E-06 | 15184 |
| LG5 | 581103692 | 1850 | 3.18E-06 | 15713 |
| LG6 | 485803872 | 1439 | 2.96E-06 | 16076 |
| LG7 | 427868946 | 1218 | 2.85E-06 | 16448 |
| LG8 | 418016564 | 1421 | 3.40E-06 | 15127 |
| LG9 | 377406850 | 2047 | 5.42E-06 | 15032 |
| LG10 | 148047574 | 732 | 4.94E-06 | 16256 |
| LG11 | 142112905 | 638 | 4.49E-06 | 13794 |
| LG12 | 134840001 | 493 | 3.66E-06 | 12899 |

**Table S2. dN, dS and dN/dS values of different categories.**

| Category |  | *d*N | *d*S | *d*N/*d*S |
| --- | --- | --- | --- | --- |
| X-conserved |  | 0.015714d | 0.137885d | 0.101397e |
| A-X |  | 0.028111c | 0.190683c | 0.144579d |
| X-X |  | 0.028380c | 0.166257d | 0.159734c |
| A-A |  | 0.041803b | 0.213579b | 0.190432b |
| X-Lmig |  | 0.103788a | 0.290710a | 0.372944a |

**Table S3. X-linked gene numbers mapping to L. migratoria X chromosome.** Gene homologs were identified by reciprocal best blast hit.

| Species | LG01 | LG02 | LG03(X) | LG04 | LG05 | LG06 | LG07 | LG08 | LG09 | LG10 | LG11 | LG12 |
| --- | --- | --- | --- | --- | --- | --- | --- | --- | --- | --- | --- | --- |
| Ischnura elegans | 25 | 75 | 73 | 16 | 15 | 15 | 6 | 11 | 10 | 0 | 1 | 2 |
| Locusta migratoria | **3157** | **3040** | **1985** | **2247** | **1850** | **1439** | **1218** | **1421** | **2067** | **732** | **638** | **493** |
| Schistocerca piceifrons | 57 | 36 | 449 | 29 | 30 | 37 | 17 | 23 | 13 | 0 | 8 | 7 |
| Schistocerca gregaria | 83 | 60 | 864 | 68 | 23 | 37 | 28 | 53 | 19 | 22 | 16 | 17 |
| Teleogryllus oceanicus | 70 | 33 | 213 | 41 | 64 | 37 | 9 | 54 | 8 | 5 | 5 | 6 |
| Timema cristinae | 58 | 19 | 73 | 23 | 7 | 13 | 3 | 7 | 75 | 0 | 2 | 0 |
| Nilaparvata lugens | 59 | 47 | 242 | 55 | 32 | 21 | 17 | 95 | 130 | 15 | 12 | 8 |
| Laodelphax striatellus | 48 | 67 | 240 | 42 | 39 | 21 | 13 | 101 | 153 | 17 | 11 | 14 |
| Sogatella furcifera | 40 | 39 | 236 | 22 | 14 | 12 | 11 | 87 | 134 | 10 | 11 | 10 |
| Pachypsylla venusta | 41 | 37 | 216 | 47 | 22 | 16 | 14 | 55 | 87 | 37 | 60 | 9 |
| Acyrthosiphon pisum | 304 | 311 | 292 | 227 | 176 | 169 | 43 | 87 | 102 | 26 | 33 | 25 |
| Rhopalosiphum maidis | 166 | 148 | 133 | 117 | 87 | 75 | 32 | 39 | 51 | 2 | 11 | 11 |
| Chrysoperla carnea | 94 | 36 | 128 | 25 | 50 | 33 | 21 | 7 | 25 | 0 | 2 | 3 |
| Pogonus chalceus | 35 | 16 | 36 | 12 | 14 | 26 | 14 | 3 | 6 | 0 | 2 | 0 |
| Photinus pyralis | 95 | 30 | 182 | 20 | 58 | 64 | 39 | 14 | 13 | 7 | 8 | 19 |
| Rhagonycha fulva | 82 | 34 | 103 | 26 | 46 | 37 | 30 | 8 | 19 | 0 | 1 | 1 |
| Tribolium castaneum | 133 | 41 | 266 | 42 | 99 | 103 | 56 | 6 | 20 | 8 | 3 | 2 |
| Pyrochroa serraticornis | 71 | 27 | 107 | 22 | 45 | 37 | 26 | 7 | 15 | 0 | 2 | 1 |
| Coccinella septempunctata | 67 | 24 | 91 | 25 | 34 | 32 | 26 | 6 | 16 | 1 | 2 | 2 |
| Harmonia axyridis | 100 | 33 | 173 | 25 | 49 | 59 | 42 | 7 | 19 | 7 | 7 | 5 |
| Hermetia illucens | 20 | 15 | 95 | 9 | 4 | 5 | 15 | 3 | 20 | 5 | 0 | 3 |
| Drosophila melanogaster | 4 | 4 | 35 | 2 | 0 | 0 | 5 | 0 | 9 | 2 | 0 | 2 |
| Cydia pomonella | 68 | 99 | 62 | 23 | 63 | 23 | 3 | 10 | 18 | 14 | 3 | 2 |
| Heliconius melpomene | 61 | 15 | 23 | 18 | 72 | 15 | 1 | 6 | 16 | 13 | 1 | 1 |
| Bombyx mori | 91 | 22 | 15 | 18 | 153 | 9 | 8 | 8 | 13 | 47 | 6 | 5 |

**Table S4. The chi-squared tests P values for X conservation analysis.**

| Species | LG01 | LG02 | LG03(X) | LG04 | LG05 | LG06 | LG07 | LG08 | LG09 | LG10 | LG11 | LG12 |
| --- | --- | --- | --- | --- | --- | --- | --- | --- | --- | --- | --- | --- |
| Ischnura elegans | 2.7E-02 | 7.2E-10 | 7.3E-23 | 2.7E-02 | 1.0E-01 | 5.2E-01 | 2.0E-02 | 1.2E-01 | 2.5E-03 | 2.7E-03 | 1.5E-02 | 9.9E-02 |
| Locusta migratoria | 1.0E+00 | 1.0E+00 | 1.0E+00 | 1.0E+00 | 1.0E+00 | 1.0E+00 | 1.0E+00 | 1.0E+00 | 1.0E+00 | 1.0E+00 | 1.0E+00 | 1.0E+00 |
| Schistocerca piceifrons | 4.4E-07 | 1.1E-11 | 0.0E+00 | 2.6E-08 | 1.8E-05 | 6.4E-02 | 9.5E-05 | 1.7E-04 | 5.0E-12 | 4.4E-07 | 2.5E-03 | 1.4E-02 |
| Schistocerca gregaria | 8.8E-17 | 8.2E-22 | 0.0E+00 | 3.5E-10 | 2.5E-18 | 1.2E-08 | 1.9E-08 | 8.2E-05 | 1.8E-22 | 3.1E-04 | 1.1E-04 | 1.0E-02 |
| Teleogryllus oceanicus | 1.1E-01 | 7.0E-08 | 8.2E-106 | 1.2E-02 | 4.3E-02 | 7.9E-01 | 3.3E-05 | 1.1E-02 | 2.3E-10 | 9.3E-04 | 3.3E-03 | 4.6E-02 |
| Timema cristinae | 2.9E-02 | 3.9E-04 | 3.2E-18 | 1.5E-01 | 2.4E-04 | 1.2E-01 | 7.5E-04 | 4.4E-03 | 1.6E-18 | 1.5E-03 | 2.2E-02 | 9.1E-03 |
| Nilaparvata lugens | 2.4E-07 | 1.9E-09 | 9.3E-90 | 3.6E-03 | 2.0E-05 | 1.7E-05 | 4.6E-05 | 1.2E-09 | 7.8E-11 | 2.6E-02 | 2.1E-02 | 2.0E-02 |
| Laodelphax striatellus | 6.6E-11 | 7.9E-06 | 7.0E-81 | 3.2E-06 | 2.2E-04 | 6.0E-06 | 1.1E-06 | 1.1E-10 | 8.1E-18 | 4.3E-02 | 7.6E-03 | 2.8E-01 |
| Sogatella furcifera | 5.7E-09 | 1.5E-08 | 3.0E-110 | 1.3E-08 | 1.2E-08 | 1.1E-06 | 1.4E-05 | 7.7E-11 | 5.6E-19 | 8.0E-03 | 5.0E-02 | 1.8E-01 |
| Pachypsylla venusta | 3.9E-09 | 1.6E-09 | 2.6E-83 | 4.3E-03 | 1.8E-06 | 1.2E-05 | 7.8E-05 | 1.3E-01 | 5.7E-03 | 4.0E-03 | 7.7E-19 | 9.5E-02 |
| Acyrthosiphon pisum | 1.4E-01 | 1.1E-02 | 1.9E-18 | 4.7E-02 | 3.4E-01 | 2.3E-04 | 4.2E-10 | 5.3E-04 | 3.9E-09 | 1.4E-06 | 1.8E-03 | 4.7E-03 |
| Rhopalosiphum maidis | 9.6E-03 | 1.3E-01 | 2.6E-07 | 3.9E-02 | 4.1E-01 | 9.6E-02 | 4.8E-03 | 4.6E-03 | 7.8E-05 | 1.5E-07 | 1.7E-03 | 2.7E-02 |
| Chrysoperla carnea | 5.8E-04 | 5.4E-04 | 4.7E-41 | 1.3E-03 | 6.9E-02 | 6.0E-01 | 3.7E-01 | 3.1E-05 | 6.5E-03 | 9.1E-05 | 1.9E-03 | 2.3E-02 |
| Pogonus chalceus | 6.1E-02 | 8.3E-02 | 6.5E-07 | 1.5E-01 | 8.0E-01 | 2.6E-05 | 1.9E-01 | 1.2E-02 | 9.4E-03 | 1.5E-02 | 1.6E-01 | 4.6E-02 |
| Photinus pyralis | 3.1E-01 | 8.0E-09 | 1.8E-68 | 1.6E-07 | 2.7E-01 | 6.1E-05 | 3.0E-01 | 7.9E-05 | 1.2E-08 | 4.0E-03 | 2.6E-02 | 1.2E-01 |
| Rhagonycha fulva | 5.2E-03 | 1.6E-03 | 4.0E-26 | 9.9E-03 | 7.3E-02 | 6.9E-02 | 1.6E-01 | 2.4E-04 | 1.3E-03 | 1.9E-04 | 1.4E-03 | 6.1E-03 |
| Tribolium castaneum | 2.9E-01 | 2.3E-12 | 1.4E-104 | 1.8E-06 | 9.4E-04 | 1.4E-10 | 1.8E-01 | 4.7E-11 | 3.7E-11 | 1.5E-04 | 1.4E-05 | 9.9E-05 |
| Pyrochroa serraticornis | 4.6E-02 | 2.4E-04 | 1.3E-33 | 4.6E-03 | 3.4E-02 | 2.4E-02 | 3.5E-01 | 2.8E-04 | 4.0E-04 | 3.1E-04 | 5.6E-03 | 8.8E-03 |
| Coccinella septempunctata | 2.3E-02 | 3.7E-04 | 1.4E-25 | 6.4E-02 | 4.4E-01 | 6.6E-02 | 1.5E-01 | 4.2E-04 | 3.2E-03 | 1.7E-03 | 9.9E-03 | 3.5E-02 |
| Harmonia axyridis | 4.6E-02 | 2.4E-07 | 2.9E-64 | 1.3E-05 | 8.9E-01 | 4.0E-04 | 6.5E-02 | 8.6E-07 | 2.8E-06 | 5.9E-03 | 1.9E-02 | 2.9E-02 |
| Hermetia illucens | 6.3E-02 | 9.0E-03 | 4.5E-68 | 7.0E-03 | 1.1E-03 | 1.8E-02 | 3.3E-01 | 4.0E-03 | 9.3E-01 | 4.5E-01 | 1.3E-02 | 4.3E-01 |
| Drosophila melanogaster | 6.3E-02 | 7.6E-02 | 3.8E-31 | 5.9E-02 | 1.6E-02 | 3.4E-02 | 5.3E-01 | 3.6E-02 | 3.0E-01 | 8.6E-01 | 1.6E-01 | 7.1E-01 |
| Cydia pomonella | 3.3E-01 | 8.9E-08 | 9.9E-05 | 2.3E-03 | 3.6E-06 | 3.9E-01 | 2.6E-05 | 9.7E-04 | 7.1E-04 | 1.0E+00 | 8.4E-03 | 1.5E-02 |
| Heliconius melpomene | 1.5E-04 | 4.1E-04 | 8.9E-01 | 8.8E-02 | 2.4E-26 | 6.0E-01 | 3.8E-04 | 7.8E-03 | 8.8E-02 | 1.5E-01 | 1.6E-02 | 4.4E-02 |
| Bombyx mori | 1.7E-04 | 1.3E-06 | 1.4E-04 | 9.7E-05 | 1.8E-84 | 3.2E-04 | 1.2E-03 | 1.8E-04 | 2.1E-05 | 4.5E-18 | 6.8E-02 | 1.4E-01 |

**Table S5. Over/under-enrichment analysis for each grasshopper chromosome.** A chi-squared test was used for the test of X-linked genes distribution against L. migratoria chromosomes. In short, we used a chi-squared test to determine whether any L. migratoria chromosome contained statistically more or less genes from a test organism X chromosome, based on the total number of genes on that L.migratoria chromosome as a proportion of the total number of genes in the genome (chi-squared test, 1 d.f.).
